# Supplementary material for: Glucose-dependent Insulinotropic Polypeptide (GIP) Resistance and β-cell Dysfunction Contribute to Hyperglycaemia in Acromegaly
Source: PubMed Central journal article supplement (PMC6449401; doi:10.1038/s41598-019-41887-7), 2019-04-04
Supplement: 41598_2019_41887_MOESM1_ESM.pdf [file 41598_2019_41887_MOESM1_ESM.pdf]

**Glucose-dependent Insulinotropic Polypeptide (GIP) Resistance and  $\beta$ -cell Dysfunction Contribute to Hyperglycaemia in Acromegaly**

Vikram Singh Shekhawat<sup>1</sup>, Shobhit Bhansali<sup>1</sup>, Pinaki Dutta<sup>1</sup>, Kanchan Kumar Mukherjee<sup>2</sup>, Kim Vaiphei<sup>3</sup>, Rakesh Kochhar<sup>4</sup>, Saroj K Sinha<sup>4</sup>, Naresh Sachdeva<sup>1</sup>, Anura V Kurpad<sup>5</sup>, Kishor Bhat<sup>5</sup>, Sunder Mudaliar<sup>6</sup>, Anil Bhansali<sup>1\*</sup>

<sup>1</sup>Department of Endocrinology, <sup>2</sup>Department of Neurosurgery, <sup>3</sup>Department of Pathology, <sup>4</sup>Department of Gastroenterology, PGIMER Chandigarh, Sector 12, Chandigarh, 160012, India, <sup>5</sup>Department of Physiology, St. John's Medical College, Bangalore, India, <sup>6</sup>Department of Medicine, University of California, San Diego, La Jolla, California, USA

Correspondence:

Dr Anil Bhansali

Professor and Head, Department of Endocrinology, PGIMER, Chandigarh, India.

Pincode 160012 ,Telephone +91 0172 2756583.

Email : [anilbhansaliendocrine@gmail.com](mailto:anilbhansaliendocrine@gmail.com).

**Supplementary Table 1: Δ Change in glycaemic status after surgery**

| <b>Parameters</b>                             | <b>Acromegaly Cured<br/>(n = 8)<br/>Mean± S.D.<br/>(Mean Rank )</b> | <b>Acromegaly Not Cured<br/>(n = 12)<br/>Mean± S.D.<br/>(Mean Rank)</b> | <b>Man Whitney U<br/>test<br/>Chi square<br/>(P value)</b> |
|-----------------------------------------------|---------------------------------------------------------------------|-------------------------------------------------------------------------|------------------------------------------------------------|
| <b>FPG (mg/dl)</b>                            | <b>-35.4± 52.4<br/>(9)</b>                                          | <b>-13.9± 20.6<br/>(11.50)</b>                                          | <b>0.857(0.355)</b>                                        |
| <b>FPI (μU/ml)</b>                            | <b>-14.8±8.9<br/>(8.75)</b>                                         | <b>-11.4±8.7<br/>MR=11.67</b>                                           | <b>1.167(0.280)</b>                                        |
| <b>Fasting C-peptide<br/>(ng/ml)</b>          | <b>-2.0±1.6<br/>(9.88)</b>                                          | <b>-1.6±1.2<br/>(10.92)</b>                                             | <b>0.149<br/>(0.700)</b>                                   |
| <b>HOMA-IR</b>                                | <b>-1.8± 1.2<br/>(9.13)</b>                                         | <b>-1.2±1.0<br/>(11.42)</b>                                             | <b>0.720<br/>(0.396)</b>                                   |
| <b>HOMA- IS</b>                               | <b>27.5±15.4<br/>(12.75)</b>                                        | <b>25.9±44.8<br/>MR=9</b>                                               | <b>1.929(0.165)</b>                                        |
| <b>Matsuda Index</b>                          | <b>4.9±2.9<br/>(14.25)</b>                                          | <b>2.0±1.9<br/>(8)</b>                                                  | <b>1.168<br/>(0.021*)</b>                                  |
| <b>HOMA-β</b>                                 | <b>-9.4±89.5<br/>(11.50)</b>                                        | <b>-13.8±37.7<br/>(9.83)</b>                                            | <b>0.381<br/>(0.537)</b>                                   |
| <b>Insulinogenic index</b>                    | <b>-2.2±3.9<br/>(8.75)</b>                                          | <b>-0.5±1.9<br/>(11.67)</b>                                             | <b>1.168<br/>(0.280)</b>                                   |
| <b>Hyperinsulinemic Euglycemic Clamp(HEC)</b> |                                                                     |                                                                         |                                                            |
| <b>GDR (mg/kg/min)</b>                        | <b>1.7±1.5<br/>(11.38)</b>                                          | <b>1.3±1.2<br/>(9.92)</b>                                               | <b>0.292<br/>(0.589)</b>                                   |

|                                 |                            |                           |                          |
|---------------------------------|----------------------------|---------------------------|--------------------------|
| <b>IS<br/>(mg/kg/min/uU/ml)</b> | <b>5.3,3.2<br/>(13.31)</b> | <b>2.9,2.8<br/>(8.63)</b> | <b>3.016<br/>(0.082)</b> |
|---------------------------------|----------------------------|---------------------------|--------------------------|

\* Significant difference between the groups

FPG- Fasting plasma glucose; FPI- Fasting plasma insulin; FPC- Fasting plasma c-peptide; HOMA-IR- Homeostatic model assessment of insulin resistance; HOMA- $\beta$  -Homeostatic model assessment of  $\beta$  cell function; HOMA-IS- Homeostatic model assessment of insulin sensitivity; GDR: Glucose disposal rate; and IS- insulin sensitivity.

**Supplementary Table 2 :  $\Delta$  Change in glycaemic status and incretin parameters after surgery during MMT**

| <b>Parameters</b>                                               | <b>Acromegaly Cured<br/>(n = 8)<br/>Mean<math>\pm</math>S.D.<br/>(Mean Rank )</b> | <b>Acromegaly Not Cured<br/>(n = 12)<br/>Mean<math>\pm</math> S.D.<br/>(Mean Rank )</b> | <b><i>Man Whitney U test</i><br/><br/><i>Chi square</i><br/>(P value)</b> |
|-----------------------------------------------------------------|-----------------------------------------------------------------------------------|-----------------------------------------------------------------------------------------|---------------------------------------------------------------------------|
| <b>AUC-glucose (mg/dl <math>\times</math> min)</b>              | <b>-8586.0<math>\pm</math>15515.5<br/>(11.13)</b>                                 | <b>-7762.5<math>\pm</math>9220.7<br/>(10.08)</b>                                        | <b>0.149<br/>(0.700)</b>                                                  |
| <b>AUC-Insulin (<math>\mu</math>U/ml<math>\times</math>min)</b> | <b>-22551.9<math>\pm</math>21332.1<br/>(7.50)</b>                                 | <b>-8313.3<math>\pm</math>9521.9<br/>(12.50)</b>                                        | <b>3.429<br/>(0.064)</b>                                                  |
| <b>AUC- C- peptide (ng/ml x min)</b>                            | <b>-1019.9<math>\pm</math>486.4<br/>(8.25)</b>                                    | <b>-765.5<math>\pm</math>877.3<br/>(12.00)</b>                                          | <b>1.929<br/>(0.165)</b>                                                  |
| <b>Fasting GIP(pmol/L)</b>                                      | <b>-18.0<math>\pm</math>24.1<br/>(10.25)</b>                                      | <b>-12.3<math>\pm</math>26.1<br/>(10.67)</b>                                            | <b>0.024<br/>(0.877)</b>                                                  |
| <b>AUC-GIP (pmol/L <math>\times</math> min)</b>                 | <b>-9654.1<math>\pm</math>5919.1<br/>(7.75)</b>                                   | <b>-4335.9<math>\pm</math>7440.2<br/>(12.33)</b>                                        | <b>2.881<br/>(0.090)</b>                                                  |
| <b>Fasting GLP-1 (pmol/L)</b>                                   | <b>0.2<math>\pm</math>3.7<br/>(9.88)</b>                                          | <b>-1.4<math>\pm</math>9.1<br/>(10.92)</b>                                              | <b>0.149<br/>(0.700)</b>                                                  |
| <b>AUC-GLP1 (pmol/L <math>\times</math> min)</b>                | <b>731.3<math>\pm</math>1826.2<br/>(11.38)</b>                                    | <b>-887.5<math>\pm</math>3066.3<br/>(9.92)</b>                                          | <b>0.292<br/>(0.589)</b>                                                  |
| <b>Fasting Glucagon (pmol/L)</b>                                | <b>-8.1<math>\pm</math> 5.8<br/>(11.75)</b>                                       | <b>-12.2<math>\pm</math>12.4<br/>(9.67)</b>                                             | <b>0.595<br/>(0.440)</b>                                                  |
| <b>AUC Glucagon (pmol/L<math>\times</math> min)</b>             | <b>-1295.3<math>\pm</math>1554.1<br/>(11.63)</b>                                  | <b>-2101.2<math>\pm</math>2094.3<br/>(9.75)</b>                                         | <b>0.482<br/>(0.487)</b>                                                  |
| <b>M<sub>0</sub> x10<sup>-7</sup> (1/min)</b>                   | <b>-33.8<math>\pm</math>87.8</b>                                                  | <b>-1.8<math>\pm</math>39.6</b>                                                         | <b>1.006</b>                                                              |

|                                               |                                 |                                   |                                |
|-----------------------------------------------|---------------------------------|-----------------------------------|--------------------------------|
|                                               | <b>MR=12.63</b>                 | <b>MR=9.08</b>                    | <b>(0.316)</b>                 |
| <b>M<sub>1</sub> x10<sup>-7</sup> (1/min)</b> | <b>0.9±9.1</b><br><b>(8.88)</b> | <b>-0.9±5.4</b><br><b>(11.58)</b> | <b>1.720</b><br><b>(0.190)</b> |

\* Significant difference between the groups

AUC- Area under curve; M<sub>0</sub> – Basal β-cell function; M<sub>1</sub>- postprandial β-cell function.

**Figure Legends:**

**Supplementary Figure 1:** The bar diagram showing a significantly lower number and intensity of GIP staining cells in patients of acromegaly with diabetes as compared to healthy controls.

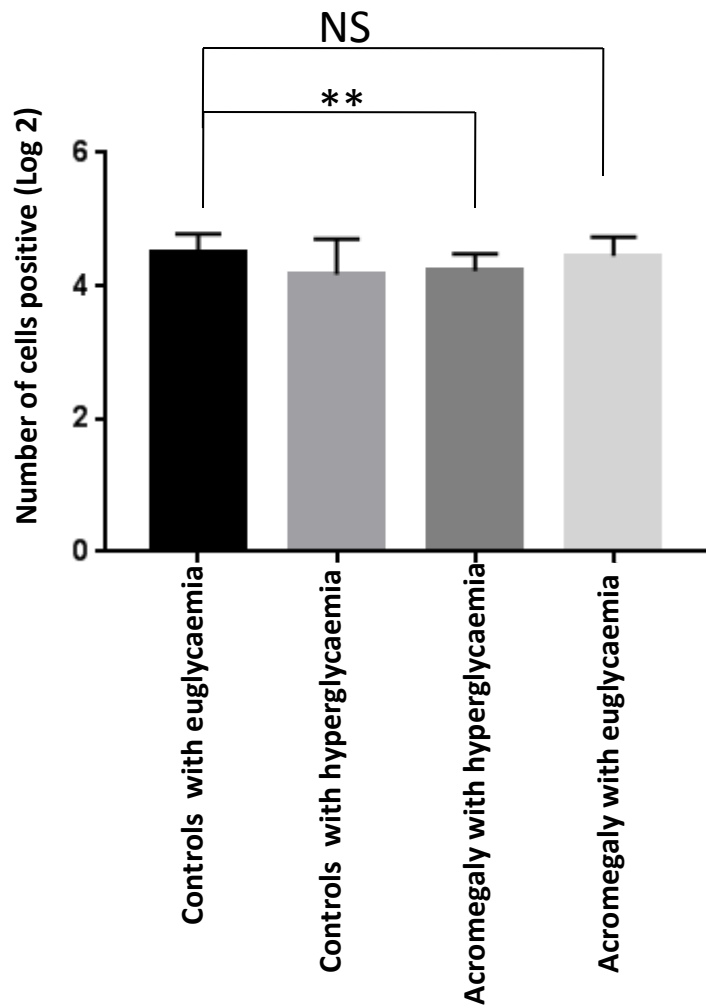

| Number of cell positive (Log2) |                                | P-value |
|--------------------------------|--------------------------------|---------|
| Controls with euglycaemia      | Acromegaly with hyperglycaemia | 0.009** |
|                                | Acromegaly with euglycaemia    | 0.4     |
| Controls with hyperglycaemia   | Acromegaly with hyperglycaemia | 0.54    |
|                                | Acromegaly with euglycaemia    | 0.75    |
| Acromegaly with hyperglycaemia | Acromegaly with euglycaemia    | 0.09    |

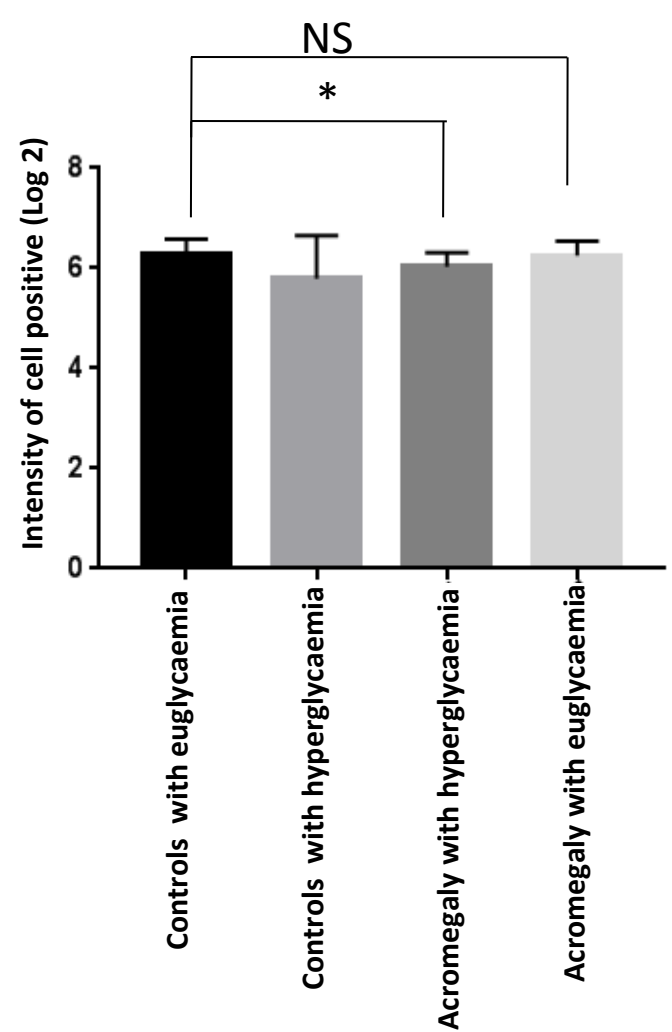

| Intensity of cell positive (Log 2) |                                | P-value |
|------------------------------------|--------------------------------|---------|
| Controls with euglycaemia          | Acromegaly with hyperglycaemia | 0.03*   |
|                                    | Acromegaly with euglycaemia    | 0.455   |
| Controls with hyperglycaemia       | Acromegaly with hyperglycaemia | 0.6526  |
|                                    | Acromegaly with euglycaemia    | 0.5848  |
| Acromegaly with hyperglycaemia     | Acromegaly with euglycaemia    | 0.1406  |
